# Supplementary material
Source: MDPI journal article supplement (https://www.mdpi.com/2073-4441/11/3/484)
Supplement: s1 [file s1]

**Table S1.** Summary of the main cultivation practices carried out at the investigated sites during the growth season 2016–2017.

| Site    | Soil Management | Cultivation | Preparatory Soil Tillage                                                                                                                        | Sowing                           | Other Practices                                                                                                  |
|---------|-----------------|-------------|-------------------------------------------------------------------------------------------------------------------------------------------------|----------------------------------|------------------------------------------------------------------------------------------------------------------|
| Gravina | CT              | Wheat       | Subsoiler at 30 cm depth, carried out in September; cultivator at 15 cm depth carried out in November                                           | November (3rd week)              | Nitrogen fertilization treatments (February 28 and March 30); weed control and fungicide (March 18 and April 30) |
| Garvina | NT              | Wheat       | No preparatory soil tillage                                                                                                                     | Sod-seeding, December (1st week) | Nitrogen fertilization treatments (February 20 and March 25); weed control (March 27)                            |
| Candela | CT              | Wheat       | Plough at 30 cm depth carried out in October; disk harrow at 15 cm depth and field cultivator at 15 cm depth carried out few days before sowing | November (3rd week)              | Nitrogen fertilization treatments (March 3 and April 15); weed control (April 2)                                 |
| Candela | NT              | Barley      | Total weed control, carried out in October                                                                                                      | Sod-seeding, December (1st week) | Nitrogen fertilization treatments (March 3); weed control (April 2)                                              |
